# Supplementary material for: GAN-argcPredNet v2.0: a radar echo extrapolation model based on spatiotemporal process enhancement
Source: Copernicus journal article supplement (doi:10.5194/gmd-17-399-2024), 2024-01-16
Supplement: Supplementary file 1 [file gmd-17-399-2024-supplement.pdf]

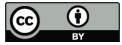

*Supplement of*

## **GAN-argcPredNet v2.0: a radar echo extrapolation model based on spatiotemporal process enhancement**

**Kun Zheng et al.**

*Correspondence to:* Kun Zheng ([zhengk@cug.edu.cn](mailto:zhengk@cug.edu.cn)) and Huihua Ruan ([ruanhuihua@163.com](mailto:ruanhuihua@163.com))

The copyright of individual parts of the supplement might differ from the article licence.

**Table S1: This is the hyperparameters of ConvLSTM and ConvGRU. The batch size of training is 10.**

| Model    | Name           | Kernel size | Stride | Padding | Hidden states |
|----------|----------------|-------------|--------|---------|---------------|
| ConvLSTM | ConvLSTM layer | 5×5         | 1×1    | 2×2     | (64, 64, 128) |
| ConvGRU  | ConvGRU layer  | 5×5         | 1×1    | 2×2     | (64, 64, 128) |

**Table S2: This is the hyperparameters of the encoder module in the GA-ConvGRU generator. The batch size of training is 10.**

| Model                                   | Name        | Kernel size | Stride | Padding | Filter |
|-----------------------------------------|-------------|-------------|--------|---------|--------|
| GA-ConvGRU<br>(Encoder in<br>Generator) | GRU1_i2h    | 3×3         | 1×1    | 1×1     | 64     |
|                                         | GRU1_h2h    | 5×5         | 1×1    | 2×2     | 64     |
|                                         | Downsample1 | 7×7         | 3×3    | 1×1     | 64     |
|                                         | GRU2_i2h    | 3×3         | 1×1    | 1×1     | 192    |
|                                         | GRU2_h2h    | 5×5         | 1×1    | 2×2     | 192    |
|                                         | Downsample2 | 5×5         | 3×3    | 1×1     | 192    |
|                                         | GRU3_i2h    | 3×3         | 1×1    | 1×1     | 192    |
|                                         | GRU3_h2h    | 3×3         | 1×1    | 1×1     | 192    |

**Table S3: This is the hyperparameters of the decoder module in the GA-ConvGRU generator.**

| Model                                   | Name      | Kernel size | Stride | Padding | Filter |
|-----------------------------------------|-----------|-------------|--------|---------|--------|
| GA-ConvGRU<br>(Decoder in<br>Generator) | GRU3_i2h  | 3×3         | 1×1    | 1×1     | 192    |
|                                         | GRU3_h2h  | 3×3         | 1×1    | 1×1     | 192    |
|                                         | Upsample2 | 5×5         | 3×3    | 1×1     | 192    |
|                                         | GRU2_i2h  | 3×3         | 1×1    | 1×1     | 192    |
|                                         | GRU2_h2h  | 5×5         | 1×1    | 2×2     | 192    |
|                                         | Upsample1 | 7×7         | 3×3    | 1×1     | 192    |
|                                         | GRU1_i2h  | 3×3         | 1×1    | 1×1     | 64     |
|                                         | GRU1_h2h  | 5×5         | 1×1    | 2×2     | 64     |

**Table S4: This is the hyperparameters of the GA-ConvGRU discriminator.**

| Model                         | Name          | Kernel size | Stride | Padding | Filter |
|-------------------------------|---------------|-------------|--------|---------|--------|
| GA-ConvGRU<br>(Discriminator) | Convolution_1 | 7×7         | 5×5    | 1×1     | 32     |
|                               | Convolution_2 | 5×5         | 3×3    | 1×1     | 64     |
|                               | Convolution_3 | 4×4         | 4×4    | 2×2     | 128    |
|                               | Convolution_4 | 4×4         | 4×4    | 0×0     | 256    |
|                               | Convolution_5 | 4×4         | -      | -       | 1      |

**Table S5: This is the hyperparameters of the GAN-argcPredNet v1.0 generator. The batch size of training is 10.**

| Model                                   | Components         | Name              | Kernel size | Padding | Filter             |
|-----------------------------------------|--------------------|-------------------|-------------|---------|--------------------|
| GAN-<br>argcPredNet v1.0<br>(Generator) | Module $A_l$       | Convolution layer | 3×3         | 1×1     | (1, 128, 128, 256) |
|                                         |                    | Maxpool           | 3×3         | 0×0     | -                  |
|                                         | Module $\hat{A}_l$ | Convolution layer | 3×3         | 1×1     | (1, 128, 128, 256) |
|                                         | Module $R_l$       | Upsample          | 3×3         | -       | -                  |
|                                         |                    | argcLSTM          | 3×3         | 1×1     | (1, 128, 128, 256) |

**Table S6: This is the hyperparameters of the GAN-argcPredNet v1.0 discriminator.**

| Model                                   | Name          | Kernel size | Stride | Padding | Filter |
|-----------------------------------------|---------------|-------------|--------|---------|--------|
| GAN-argcPredNet v1.0<br>(Discriminator) | Convolution_1 | 3×3         | 2×2    | 1×1     | 32     |
|                                         | Convolution_2 | 3×3         | 2×2    | 1×1     | 64     |
|                                         | Convolution_3 | 3×3         | 2×2    | 1×1     | 128    |
|                                         | Convolution_4 | 3×3         | 2×2    | 1×1     | 256    |

**Table S7: This is the hyperparameters of the GAN-argcPredNet v2.0 generator. The batch size of training is 10.**

| Model                                   | Components         | Name              | Kernel size | Padding            | Filter             |
|-----------------------------------------|--------------------|-------------------|-------------|--------------------|--------------------|
| GAN-<br>argcPredNet v2.0<br>(Generator) | STIC Attention     | Convolution layer | 7×7×5       | 3×3×2              | 1                  |
|                                         | Module $A_l$       | Convolution layer | 3×3         | 1×1                | (1, 128, 128, 256) |
|                                         |                    | Maxpool           | 3×3         | 0×0                | -                  |
|                                         | Module $\hat{A}_l$ | Convolution layer | 3×3         | 1×1                | (1, 128, 128, 256) |
|                                         | Module $R_l$       | Upsample          | 3×3         | -                  | -                  |
| argcLSTM                                |                    | 3×3               | 1×1         | (1, 128, 128, 256) |                    |

**Table S8: This is the hyperparameters of the GAN-argcPredNet v2.0 discriminator.**

| Model                                   | Name                                      | Kernel size/Size | Stride | Padding | Filter |
|-----------------------------------------|-------------------------------------------|------------------|--------|---------|--------|
| GAN-argcPredNet v2.0<br>(Discriminator) | Compression Ratio of<br>Channel Attention | 8                | -      | -       | -      |
|                                         | Convolution_1                             | 3×3              | 2×2    | 1×1     | 32     |
|                                         | Convolution_2                             | 3×3              | 2×2    | 1×1     | 64     |
|                                         | Convolution_3                             | 3×3              | 2×2    | 1×1     | 128    |
|                                         | Convolution_4                             | 3×3              | 2×2    | 1×1     | 256    |
